# Supplementary material for: Microcapsule-Type Self-Healing Protective Coating for Cementitious Composites with Secondary Crack Preventing Ability
Source: MDPI journal article supplement (doi:10.3390/ma10020114), 2017-01-26
Supplement: s1 [file s1]

# Supplementary Materials: Microcapsule-Type Self-Healing Protective Coating for Cementitious Composites with Secondary Crack Preventing Ability

Dong-Min Kim, Hwan-Chul Yu, Hye-In Yang, Yu-Jin Cho, Kwang-Myong Lee and Chan-Moon Chung

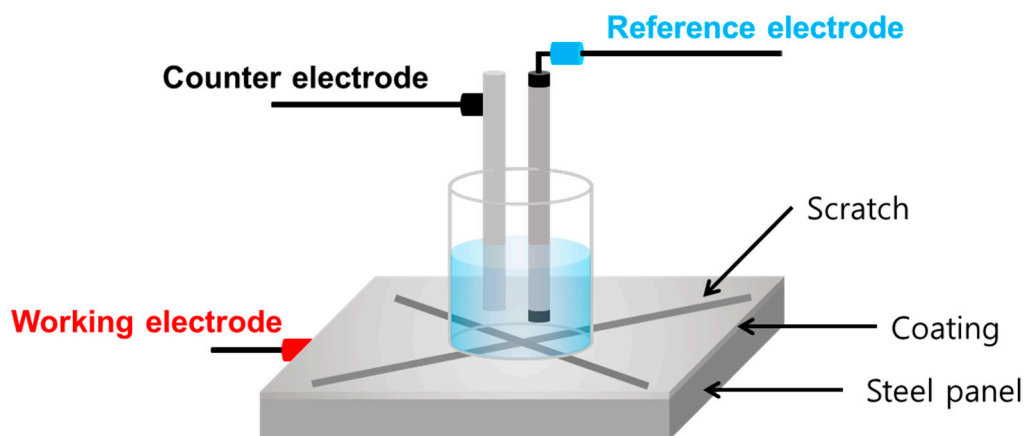

Figure S1. Schematic diagram of electrochemical test.

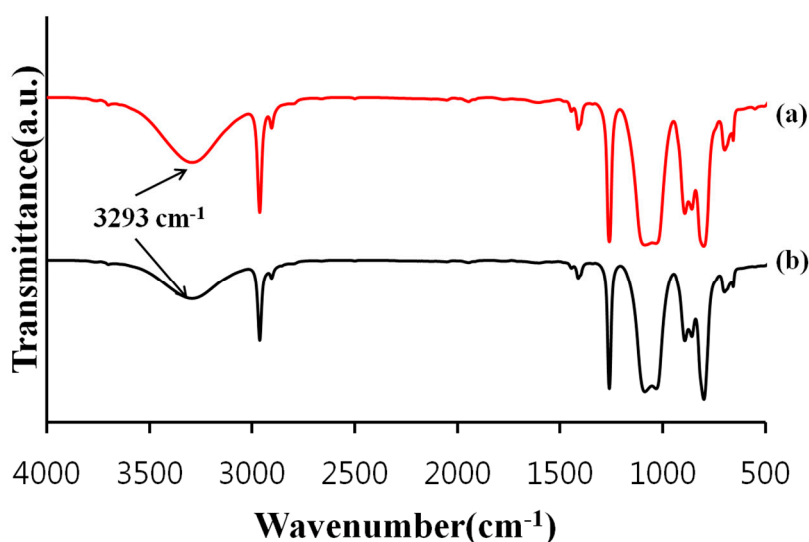

Figure S2. Infrared spectra of (a) an authentic silanol-terminated polydimethylsiloxane (STP) and (b) the core that flowed out of ruptured urea-formaldehyde (UF) microcapsules.

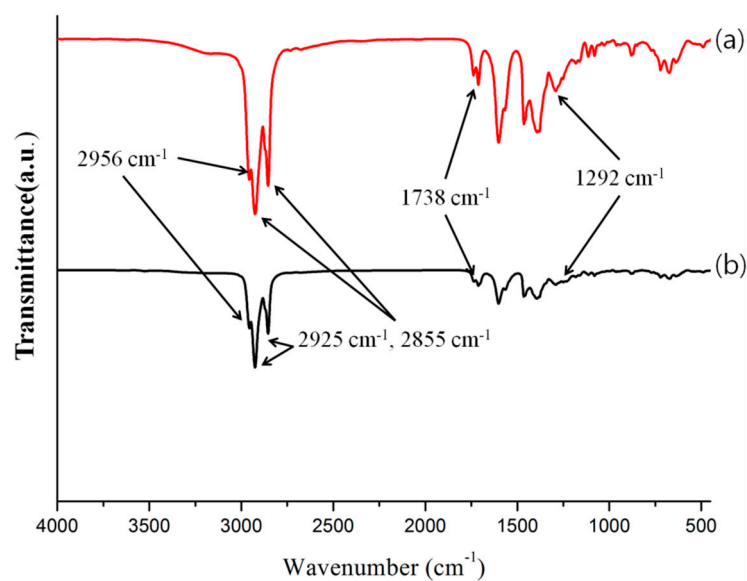

**Figure S3.** Infrared spectra of (a) an authentic dibutyltin dilaurate (DD) and (b) the core that flowed out of ruptured polyurethane (PU) microcapsules.

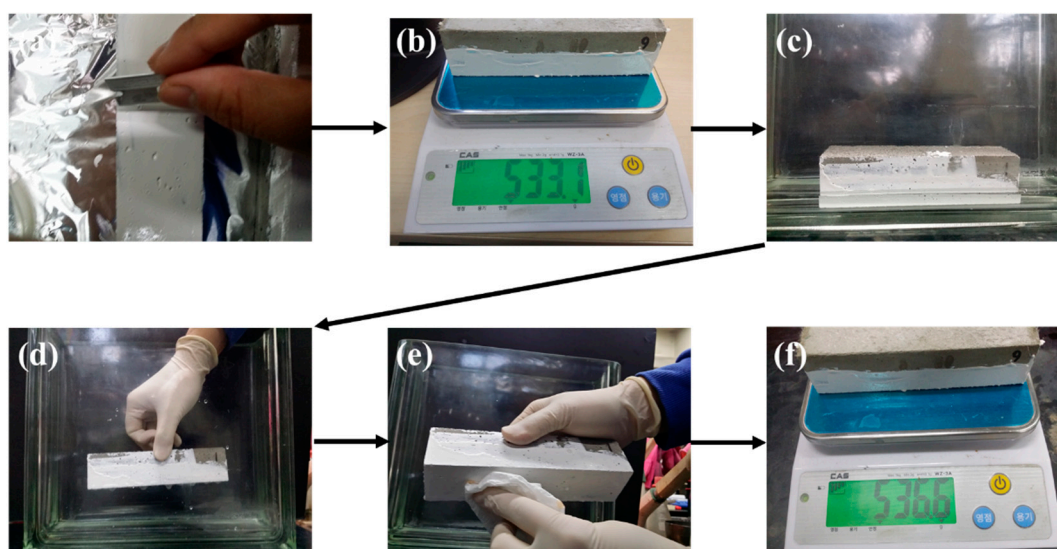

**Figure S4.** Procedure for water permeability test: (a) scratching a coating on a mortar specimen; (b) weighing; (c) immersion of coated side of the specimen in water; (d) taking the specimen out of a water bath; (e) wiping the immersed surfaces and drying; and (f) weighing.
